# Supplementary material
Source: PubMed Central journal article supplement (PMC7839837)
Supplement: mmc1.pdf [file mmc1.pdf]

## **Supplemental information**

### **Identification of SARS-CoV-2**

#### **spike mutations that attenuate monoclonal and serum antibody neutralization**

**Zhuoming Liu, Laura A. VanBlargan, Louis-Marie Bloyet, Paul W. Rothlauf, Rita E. Chen, Spencer Stumpf, Haiyan Zhao, John M. Errico, Elitza S. Theel, Mariel J. Liebeskind, Brynn Alford, William J. Buchser, Ali H. Ellebedy, Daved H. Fremont, Michael S. Diamond, and Sean P.J. Whelan**

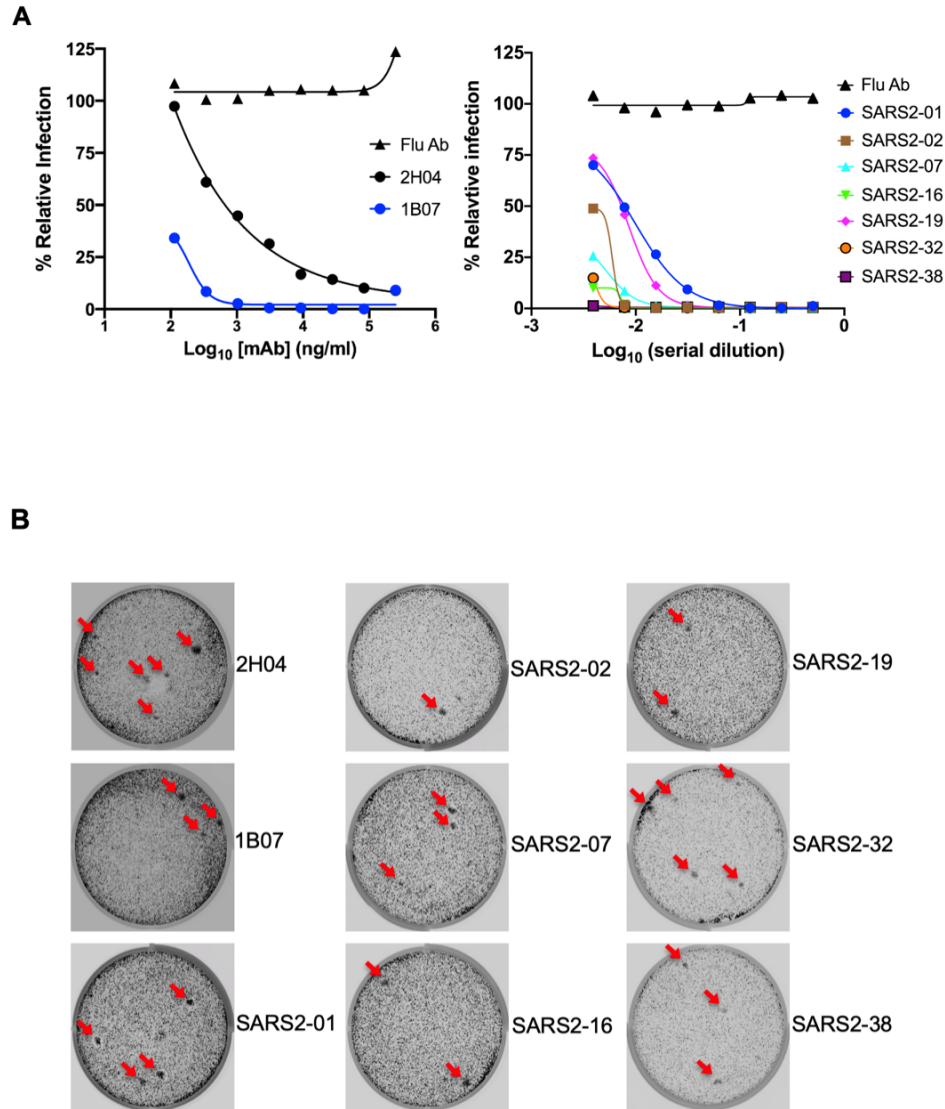

**Figure S1. Isolation of VSV-SARS-CoV-2 escape mutants by plaque assay. Related to Fig 2. (A)** RBD-specific antibodies were tested for neutralizing activity against VSV-SARS-CoV-2. MAbs in the left panel were purified from Expi293F cells transfected with antibody expression vector (pABVec6W) expressing heavy chain V-D-J and light Chain V-J cloned from single B cells. MAbs in the right panel were from hybridomas that bound to SARS-CoV-2-infected Vero CCL81 cells by flow cytometry. Data are representative of two independent experiments. **(B)** Plaque assays were performed to isolate the VSV-SARS-CoV-2-S escape mutant on Vero E6 TMRSS2 cells in the presence of the indicated mAb in the overlay. Representative images of two independent experiments are shown.

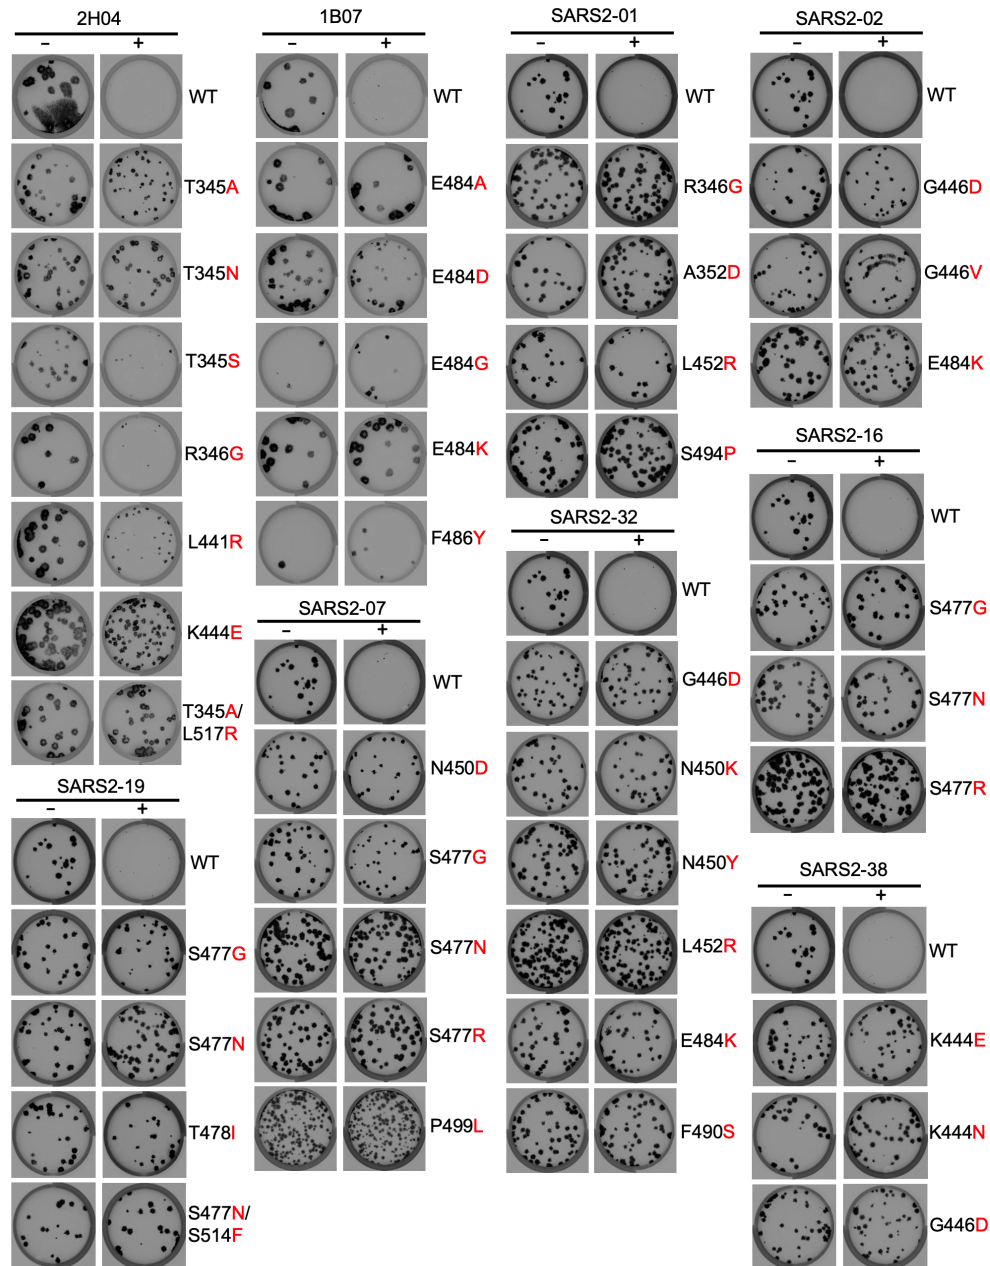

**Figure S2. Validation of selected VSV-SARS-CoV-2 mutants. Related to Fig 2.** Plaque assays were performed to validate the VSV-SARS-CoV-2 mutant on Vero cells in the presence and absence of the mAb in the overlay. MAb concentrations added in the overlay were the same as those used to select the escape mutants. Representative images of two independent experiments are shown.

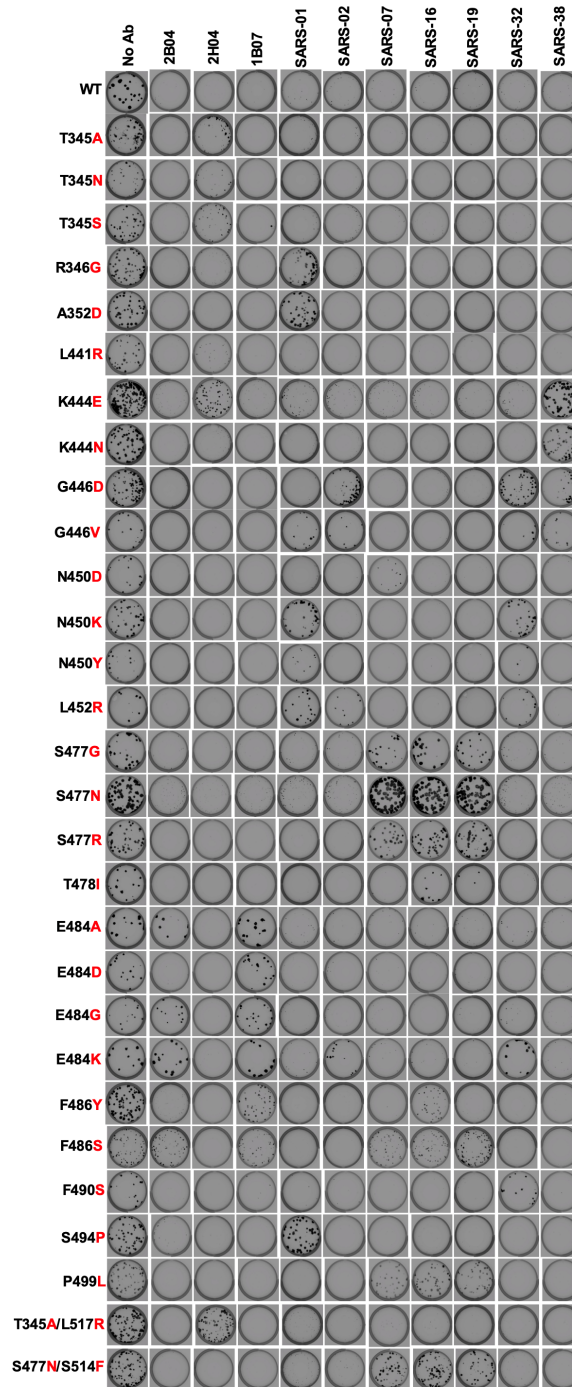

**Figure S3. Plaque assay validation of cross-neutralization of VSV-SARS-CoV-2 mutants. Related to Fig 3A.** Wild-type and identified VSV-SARS-CoV-2 mutants were tested for neutralizing activity using a plaque assay with the indicated mAb in the overlay. MAb concentrations added were the same as those used to select the escape mutants. Representative images of two independent experiments are shown.

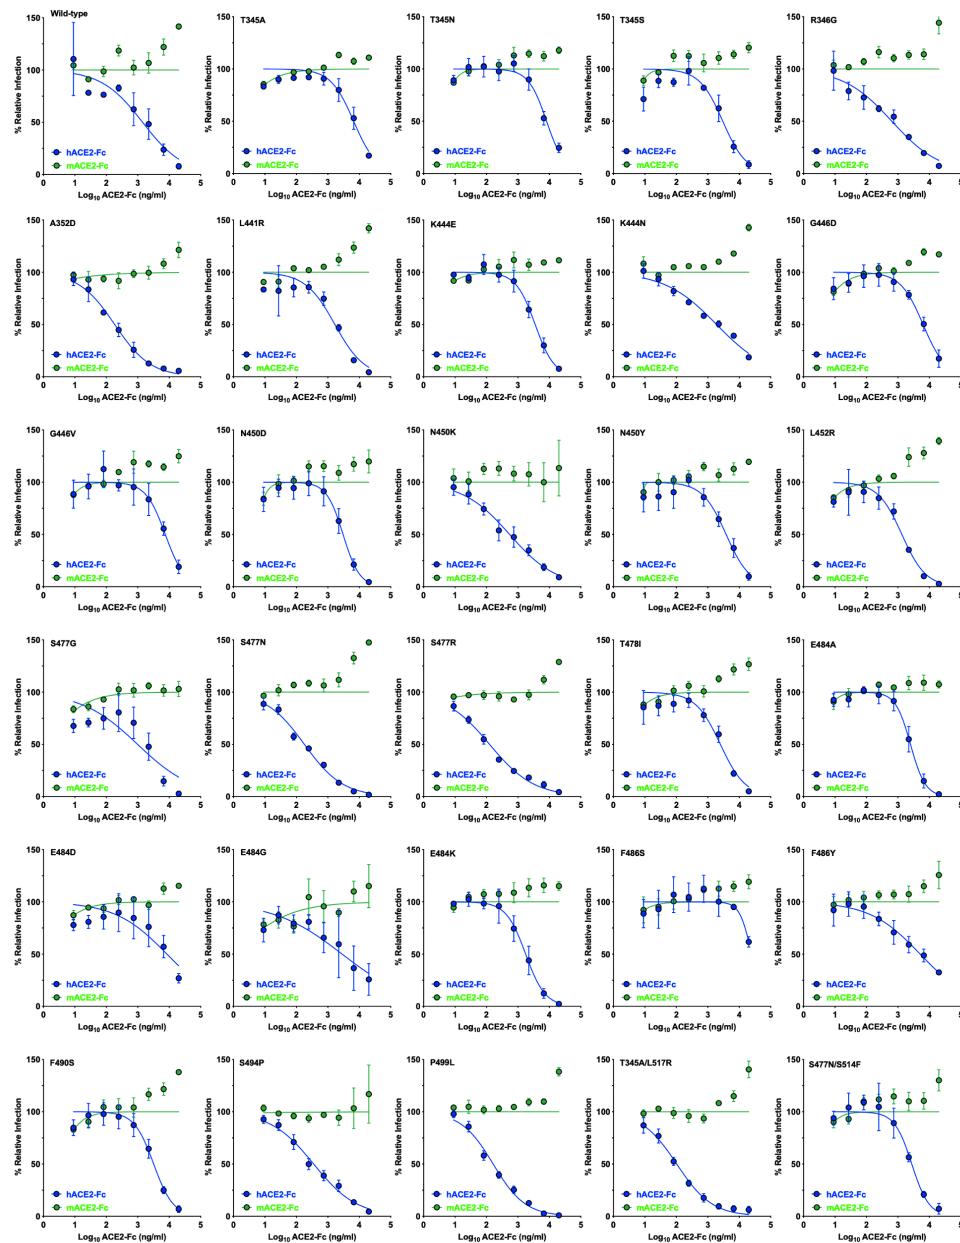

**Figure S4. Neutralization of VSV-SARS-CoV-2 mutants by hACE2 decoy receptors.** Related to Fig 3B and 3C. hACE2-Fc or mACE2-Fc were tested for neutralizing activity against wild-type and mutant VSV-SARS-CoV-2 (n=3). Error bars represent the SEM. Data are representative of three independent experiments.

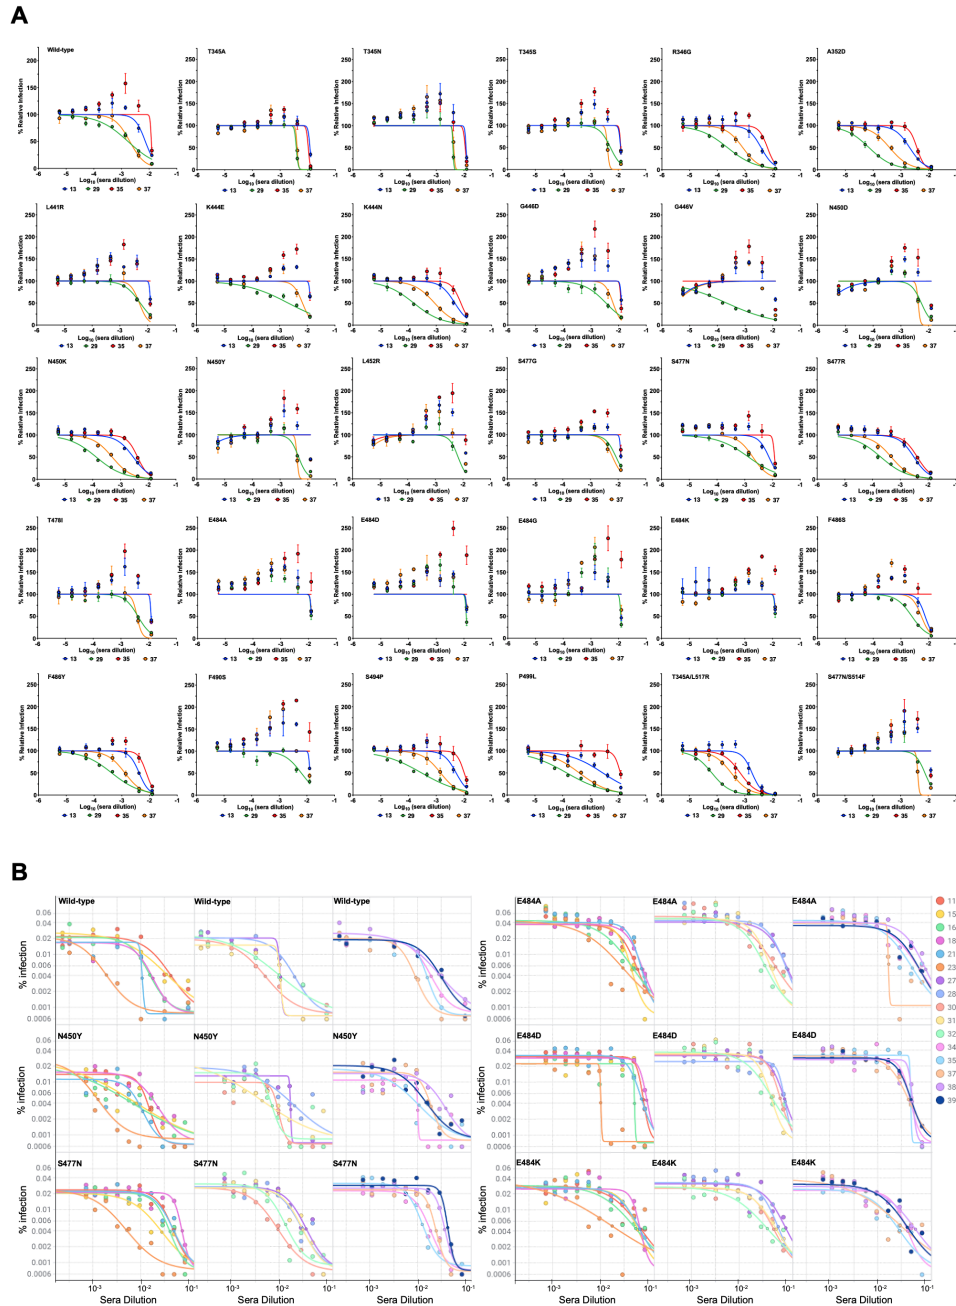

**Figure S5. Neutralization of VSV-SARS-CoV-2 mutants by human sera. Related to Fig 4. (A)** Four human sera were tested for neutralization of wild-type and mutant VSV-SARS-CoV-2 ( $n = 3$ ). Error bars represent the SEM. Data are representative of three independent experiments. Related to **Fig 4A and 4B**. **(B)** Sixteen human sera were tested for neutralization of wild-type and 5 mutant VSV-SARS-CoV-2 ( $n = 1$ ). Related to **Fig 4C**.

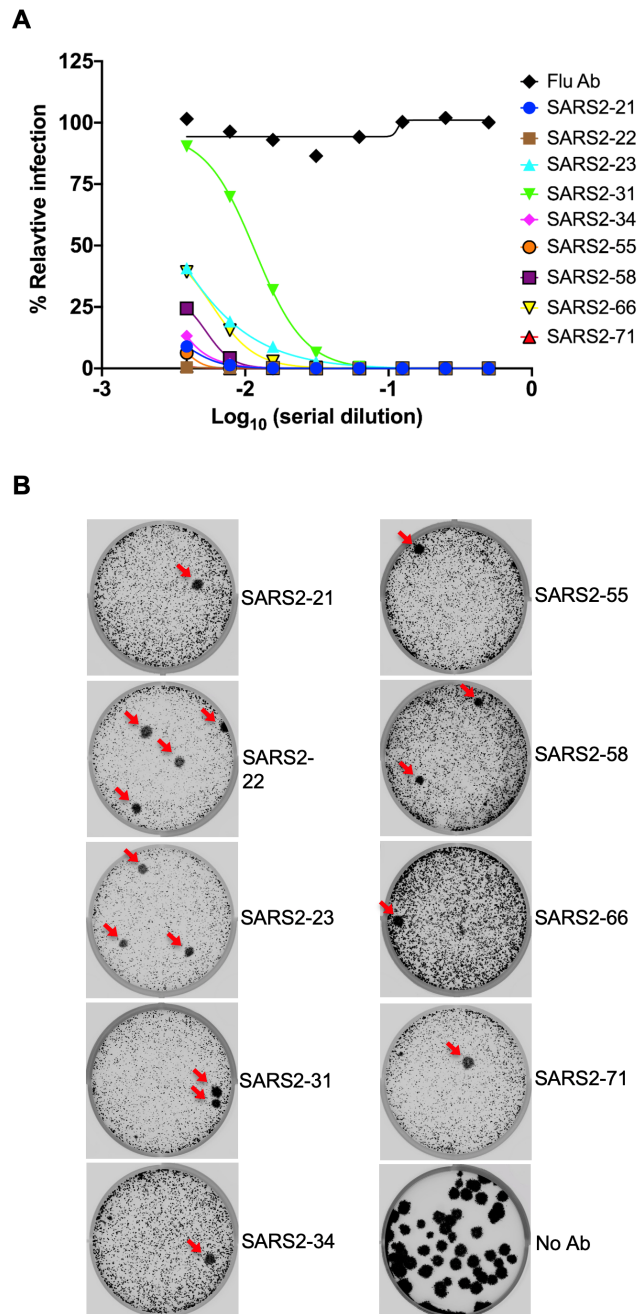

**Figure S6. A second neutralization escape selection campaign with nine additional mAbs. Related to Fig 5. (A)** Nine additional RBD-specific antibodies were tested for neutralization activity against VSV-SARS-CoV-2. Data are representative of two independent experiments. **(B)** Plaque assays were performed to isolate the VSV-SARS-CoV-2 escape mutant on Vero E6 TMPRSS2 cells in the presence of the indicated mAb in the overlay. Representative images of six independent experiments are shown.

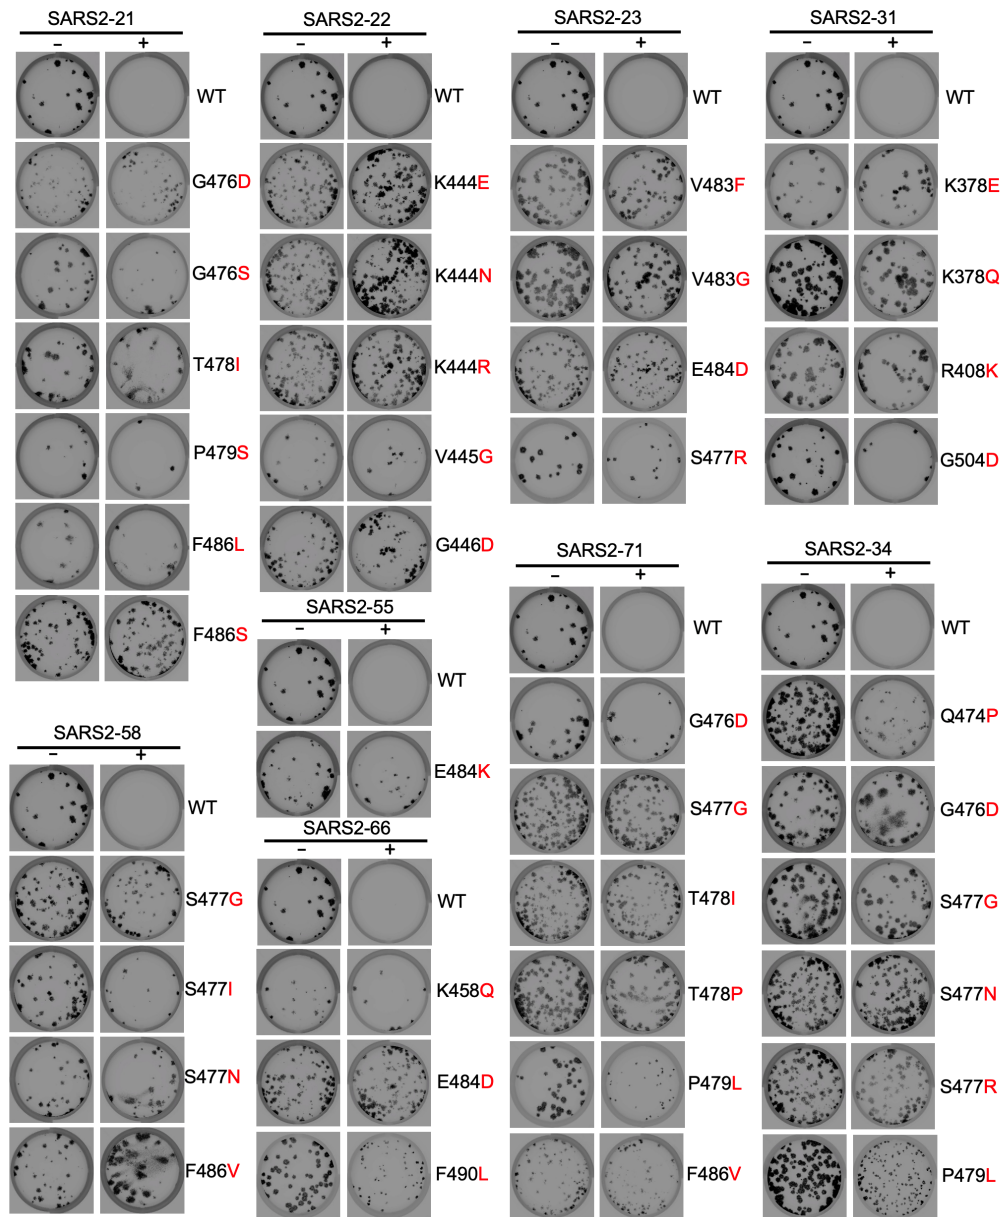

**Figure S7. Validation of selected VSV-SARS-CoV-2 mutants. Related to Fig 5.** Plaque assays were performed to validate the VSV-SARS-CoV-2 mutant on Vero cells in the presence and absence of mAb in the overlay. MAb concentration added in the overlay were the same as those used to select the escape mutants. Representative images of two independent experiments are shown.

**Table S1. List of mutants**

Campaign 1

| mAb      | Nucleotide | Amino Acid |
|----------|------------|------------|
| 2B04     | A1451C     | E484A      |
|          | G1450A     | E484K      |
|          | T1457C     | F486S      |
| 2H04     | A1033G     | T345A      |
|          | C1034A     | T345N      |
|          | A1033T     | T345S      |
|          | A1036G     | R346G      |
|          | T1322G     | L441R      |
|          | A1330G     | K444E      |
|          | A1033G     | T345A      |
|          | /T1550G    | /L517R     |
| 1B07     | A1451C     | E484A      |
|          | A1452C     | E484D      |
|          | A1451G     | E484G      |
|          | G1450A     | E484K      |
|          | T1457A     | F486Y      |
| SARS2-01 | A1036G     | R346G      |
|          | C1055A     | A352D      |
|          | T1355G     | L452R      |
|          | T1480C     | S494P      |
| SARS2-02 | G1337A     | G446D      |
|          | G1337T     | G446V      |
|          | G1450A     | E484K      |
| SARS2-07 | A1348G     | N450D      |
|          | A1429G     | S477G      |
|          | G1430A     | S477N      |
|          | C1431G     | S477R      |
|          | C1496T     | P499L      |
| SARS2-16 | A1429G     | S477G      |
|          | G1430A     | S477N      |
|          | C1431A     | S477R      |
| SARS2-19 | A1429G     | S477G      |
|          | G1430A     | S477N      |
|          | C1433T     | T478I      |
|          | G1430A     | S477N      |
|          | /C1541T    | /S514F     |
| SARS2-32 | G1337A     | G446D      |
|          | T1350G     | N450K      |
|          | A1348T     | N450Y      |
|          | T1355G     | L452R      |
|          | G1450A     | E484K      |
|          | T1469C     | F490S      |
|          | A1330G     | K444E      |
| SARS2-38 | G1332T     | K444N      |
|          | G1337A     | G446D      |

Campaign 2

| mAb      | Nucleotide | Amino Acid |
|----------|------------|------------|
| SARS2-21 | G1427A     | G476D      |
|          | G1426A     | G476S      |
|          | C1433T     | T478I      |
|          | C1435T     | P479S      |
|          | T1456C     | F486L      |
| SARS2-22 | T1457C     | F486S      |
|          | A1330G     | K444E      |
|          | G1332T     | K444N      |
|          | A1331G     | K444R      |
| SARS2-23 | T1334G     | V445G      |
|          | G1337A     | G446D      |
|          | C1431G     | S477R      |
|          | G1447T     | V483F      |
| SARS2-31 | T1448G     | V483G      |
|          | A1452C     | E484D      |
|          | A1132G     | K378E      |
| SARS2-34 | A1132C     | K378Q      |
|          | G1223A     | R408K      |
|          | G1511A     | G504D      |
|          | A1421C     | Q474P      |
| SARS2-55 | G1427A     | G476D      |
|          | A1429G     | S477G      |
|          | G1430A     | S477N      |
|          | A1429C     | S477R      |
|          | C1436T     | P479L      |
| SARS2-58 | G1450A     | E484K      |
|          | A1429G     | S477G      |
|          | G1430T     | S477I      |
| SARS2-66 | G1430A     | S477N      |
|          | T1456G     | F486V      |
|          | A1372C     | K458Q      |
|          | A1452C     | E484D      |
| SARS2-71 | T1468C     | F490L      |
|          | G1427A     | G476D      |
|          | A1427G     | S477G      |
|          | C1433T     | T478I      |
|          | A1432C     | T478P      |
| SARS2-71 | C1436T     | P479L      |
|          | T1456G     | F486V      |

### Campaign 3

| Virus                | mAb  | Nucleotide    | Amino Acid  |
|----------------------|------|---------------|-------------|
| VSV-SARS-CoV-S E484A | 2H04 | A1033G/A1451C | T345A/E484A |
|                      |      | A1036G/A1451C | T346G/E484A |
|                      |      | A1330G/A1451C | K444E/E484A |
| VSV-SARS-CoV-S E484K | 2H04 | G1037A/G1450A | R346K/E484K |
|                      |      | G1114A/G1450A | A372T/E484K |
|                      |      | A1330G/G1450A | K444E/E484K |
| VSV-SARS-CoV-S F486S | 2H04 | A1033T/T1457C | T345S/F486S |

Sanger sequencing of isolated escape variants selected for by each mAb. The mutated nucleotides and residues in the RBD region of S are highlighted in red.
